# Supplementary material
Source: publisher site journal article supplement (https://www.dovepress.com/article/455164)
Supplement: Supplementary file 1 [file get_supplementary_file.php]

Supplementary file 1: English version questionnaire

Participant’s Code No. ____________________________

Part 1: Sociodemographic characteristics of type 2 diabetes mellitus patients in Amhara region, Northwest Ethiopia, 2022.

| Ser.No | Variables | Response |
| --- | --- | --- |
| 101 | Sex | 1. Male 2. Female |
| 102 | Age (in a year) | ______________ |
| 103 | Residence | 1. Urban 2. Rural |
| 104 | Educational status | 1. No formal education 2. Primary  3. Secondary 4. Diploma and above |
| 105 | Monthly income (in Ethiopian birr) | _____________Ethiopian birr |
| 106 | | Religion | | --- | | 1. Orthodox 2. Muslim 3. Other |
| 107 | Your Current occupation | 1. Farmer 2. unemployed  3. Private worker 4. Civil servant  5. Other |
| 108 | Is your occupation a noisy area? | 1. Yes 2. No |
|  | if you say yes answer the following three questions |  |
| 109 | How many times have You worked in this occupation in a month? | ________________months |
| 110 | How many hours per week do you work in this occupation? | _____________ hours |
| 111 | Do you go to other noises ever? | 1. Yes 2. No |
| 112 | Do you get a sudden loud noise In your life? | 1. Yes 2. No |
| 113 | Do you have any relatives with hearing impairment? | 1. Yes 2. No |
|  | If your answer for no 115 is yes, please answer Q113 and 114. |  |
| 115 | Relationship with you | 1. Mother 2. Father  3. Ante/Ankle 4. Siblings 5. Others |
| 116 | What was the cause of their hearing impairment? | 1. Hereditary 2. Infection  3. Trauma 4. Unknown |

Part 2: Behavioral characteristics of type 2 diabetes mellitus patients in Amhara region, Northwest Ethiopia, 2022.

| Ser.No | Variables | Response |
| --- | --- | --- |
| 201 | Do you work regular physical exercise? | 1. Yes 2. No |
|  | If you say yes to Q 201 answer Q 202 and 203 |  |
| 202 | For how many hours per day | ------------------------hours |
| 203 | For how many hours per week | -------------------------days |
| 204 | Do you listen to music/film/songs on Earphones? | 1. Yes 2. No |
| If you say yes, answer the following three questions |  |
| 205 | How often do you use ears/headphones to listen to music/ radio | 1. Never 2. Rarely 5. Always  3. Occasionally 4. Usually |
| 206 | How many hours per day do you listen on average? | _________________hrs |
| 207 | How loud do you usually play this? | 1. Quite 2. Moderate 3. Loud |
| 208 | Do you currently smoke cigarettes? | 1. Yes 2. No |
| 209 | If you say no do you smoke previously? | 1. Yes 2. No |
|  | If your answer for number 208 or 209 is yes, please answer question No. 210 |  |
| 210 | How many packs do You smoke a cigarette in your life? | 1. < 5 packs 2. ≥ 5 packs |
| 211 | Have you ever consumed alcoholic beverages regularly (at least 1 beer or 1 glass of wine or 1 mixed drink per week) for at least one year | 1. Yes 2. No |
| 212 | If you say No have you drunk previously? | 1. Yes 2. No |
|  | If you say yes to Q 211 answer Q No 213 and 214 |  |
| 213 | Have you drunk alcohol currently? | 1. 1. Yes 2. No |
| 214 | How many bottles or glasses do You consume per month? | 1. Less than once per month,  2. Once per month,  3. 2-4 times per month,  4. 2-3 times per week,  5. More than 4 times per week. |
| 215 | Did you have any of the following conditions/ symptoms? /if there is you can choose more than one ) | 1. Frequently asking others to repeat themselves  2. Trouble following conversations that involve more than two people  3. Thinking that others are mumbling  4. Problems hearing in noisy places such as busy restaurants  5. Trouble hearing the voices of women and small children  6. Turning up the TV or radio volume too loud for others who are nearby |
| 216 | Which statement best describes your ability to hear with your ear (without a hearing aid)? | 1. Good 2. Little Trouble  3. A lot of Trouble 4. Not able to hear |

Part 3: Clinical characteristics of study participants in Amhara region, Northwest Ethiopia, 2022.

| **No** | **Variables** | **Response** |
| --- | --- | --- |
| 301 | Do you have a history of ear discharge, infections, or trauma? | 1. Yes 2. No |
| 302 | What is the duration after claiming you have type 2 diabetes? (in a year) | ____________years |
| 303 | Are you starting an Antidiabetic drug? | 1. Yes 2. No |
| If you say yes to Q 303 answer Q 304 and 305 |  |
| 304 | Type of drug/s you used | 1. Insulin only 2. Insulin and oral  3. Oral only 4. Not started |
| 305 | For how long do you take this drug? | ______years. |
| 306 | Do you have been diagnosed with hypertension | 1. Yes 2. NO |
| 307 | Are you diagnosed with Hyperlipidemia? | 1. Yes, 2. No |
| 308 | Do you have a history of heart disease? | 1. Yes 2. No |
| 309 | Do you have a history of hypothyroidism? | 1. Yes 2. No |
| 310 | Do you have history of hyperthyroidism? | 1. Yes 2. No |
| 311 | Which drugs do you take in your life?  You can answer more than one | 1. Aspirin 6. NISAID  2. Cisplatin/Carboplatin 7.Anticancer  3. Chloro/Quinine  4. Bumtamide/Frusamide  5. Gentamicine/amikacin/Kanamycin. |

Part 4: Physical and audiometric measurement of study participants in Amhara region, Northwest Ethiopia, 2022.

| Serial NO | Variables | | | | | | | | | | |
| --- | --- | --- | --- | --- | --- | --- | --- | --- | --- | --- | --- |
| 401 | Height _____________m  Weight ____________kg | | | | | | | | | | |
| 402 |
| 403 | BMI (kg / m2) | ______________kg/m2 | | | | | | | | | |
| 404 | Frequency in kHz for right ear | 0.5 | | | | 1 | | 2 | | 4 | |
| Audiometer (dB) |  | | | |  | |  | |  | |
| 405 | Presence of SNHI at 0.5,1, 2, and 4kHz in the right ear. | | | 1. Yes 2. No | | | | | | | |
|  | If yes in Q406 answer Q 407 and 408. | | |  | | | | | | | |
| 406 | The severity of SNHI in the right ear | | | 1. Mild 2. Moderate  3. Sever 4. Profound | | | | | | | |
| 407 | Frequency in kHz for left ear | | 0.5 | | | | 1 | | 2 | | 4 |
|  | Audiometer (dB) | |  | | | |  | |  | |  |
| 408 | Presence of SNHI at 0.5,1, 2, and 4kHz. | | | | 1. Yes 2. No | | | | | | |
|  | If yes in Q409 answer Q 410 and 411. | | | |  | | | | | | |
| 409 | The severity of SNHI for the left ear | | | | 1. Mild 2. Moderate  3. Sever 4. Profound | | | | | | |
| 410 | SNHI type | | | | 1. One-sided 2. Two-sided | | | | | | |
| 412 | Institution sound level | | | | ___________dB | | | | | | |

Part 5: Biochemical profiles of study participants in Amhara region, Northwest Ethiopia, 2022.

| 501 | Three months FBS (mg/dl)______________mg/dl |
| --- | --- |
